# Supplementary material for: The prognostic value of EGFR overexpression and amplification in Esophageal squamous cell Carcinoma
Source: BMC Cancer. 2015 May 8;15:377. doi: 10.1186/s12885-015-1393-8 (PMC4437683; doi:10.1186/s12885-015-1393-8)
Supplement: Additional file 3: Table S3. — EGFR IHC scores and gene variation. [file 12885_2015_1393_MOESM3_ESM.xls]

## Sheet: Supplement 3
Table S3 EGFR IHC scores and gene variation
Case no	EGFR-FISH types	1	3	4
EC041	1	90	4	110
EC063	1	240	8	110
EC070	1	200	5	90
EC002	2	80	2	10
EC006	2	100	3	40
EC011	2	180	5	100
EC016	2	210	8	100
EC024	2	240	2	10
EC025	2	80	2	10
EC026	2	200	5	80
EC029	2	200	5	90
EC040	2	300	10	150
EC043	2	320	12	170
EC045	2	270	10	130
EC050	2	180	5	60
EC058	2	160	4	80
EC060	2	210	8	100
EC062	2	180	5	60
EC064	2	180	5	10
EC073	2	400	15	280
EC079	2	200	5	90
EC083	2	0	0	0
EC023	3	180	8	90
EC036	3	240	8	90
EC044	3	200	5	110
EC059	3	300	10	140
EC065	3	120	3	80
EC105	3	270	10	130
EC005	4	300	10	200
EC008	4	280	8	110
EC010	4	270	10	180
EC015	4	180	6	90
EC017	4	270	10	120
EC018	4	280	12	130
EC021	4	0	0	0
EC028	4	240	8	100
EC030	4	200	5	90
EC031	4	200	5	80
EC033	4	300	10	185
EC035	4	160	8	180
EC038	4	300	10	130
EC047	4	100	3	50
EC049	4	140	4	50
EC054	4	270	10	110
EC055	4	200	5	100
EC056	4	180	5	100
EC057	4	320	12	200
EC066	4	280	12	115
EC067	4	180	5	90
EC068	4	270	10	100
EC069	4	80	2	30
EC071	4	300	10	110
EC076	4	240	8	110
EC078	4	180	6	120
EC080	4	240	8	110
EC081	4	180	5	90
EC084	4	300	10	120
EC085	4	80	2	70
EC089	4	160	4	50
EC091	4	200	5	80
EC092	4	30	2	30
EC097	4	270	10	170
EC100	4	140	8	170
EC101	4	100	5	100
EC103	4	200	5	110
EC104	4	60	2	30
EC106	4	200	5	100
EC001	5	210	8	90
EC003	5	240	4	80
EC007	5	20	1	20
EC009	5	180	6	180
EC014	5	0	0	0
EC019	5	240	8	110
EC020	5	270	10	180
EC022	5	240	8	100
EC027	5	0	0	0
EC032	5	270	10	105
EC034	5	210	8	100
EC037	5	240	9	150
EC039	5	270	10	90
EC048	5	180	5	90
EC053	5	300	10	170
EC072	5	200	5	100
EC074	5	140	4	80
EC082	5	240	8	110
EC088	5	240	8	90
EC095	5	180	6	120
EC096	5	200	5	90
EC098	5	180	5	30
EC004	6	400	15	300
EC042	6	400	15	300
EC051	6	400	15	300
EC077	6	360	15	270
EC086	6	320	12	250
EC087	6	280	12	180
EC094	6	280	12	180
1, 3 and 4, scoring systerm 1, 3 and 4.
